# Supplementary material for: Effects of Pera Orange Juice and Moro Orange Juice in Healthy Rats: A Metabolomic Approach
Source: MDPI journal article supplement (doi:10.3390/metabo13080902), 2023-08-02
Supplement: s1 [file s1]

Analysis of Variable Importance in Projection (VIP). Main masses of low molecular weight (100 to 700 *m/z*) responsible for discriminating between the PO group and the C group.

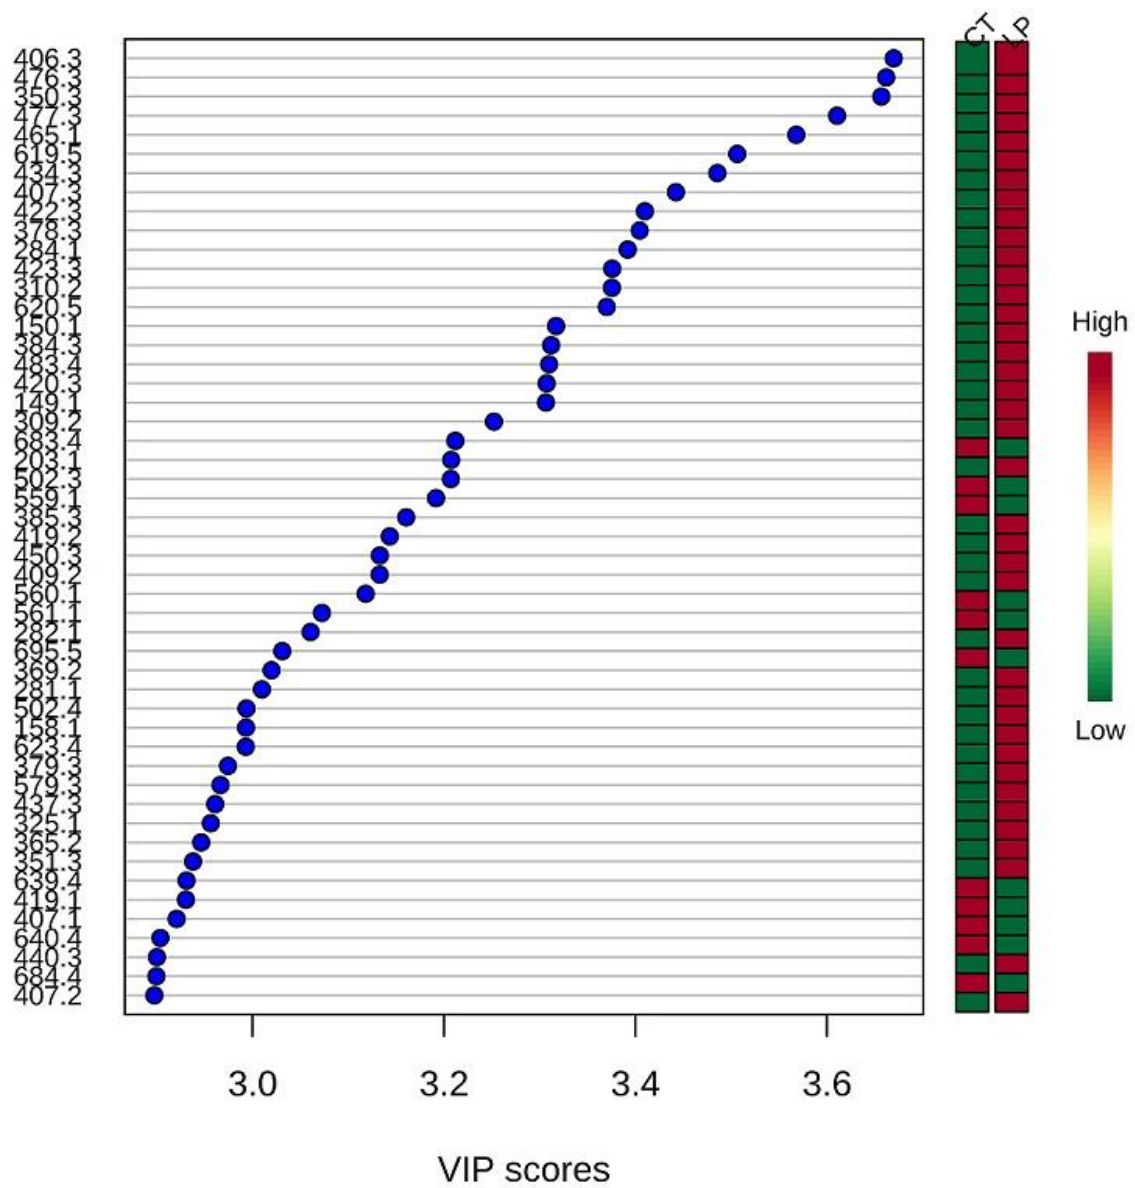

CT: Control group (C); LP: Pera Orange Group (PO)

Analysis of Variable Importance in Projection (VIP). Main masses of low molecular weight (700 a 1700 *m/z*) responsible for discriminating between the PO group and the C group.

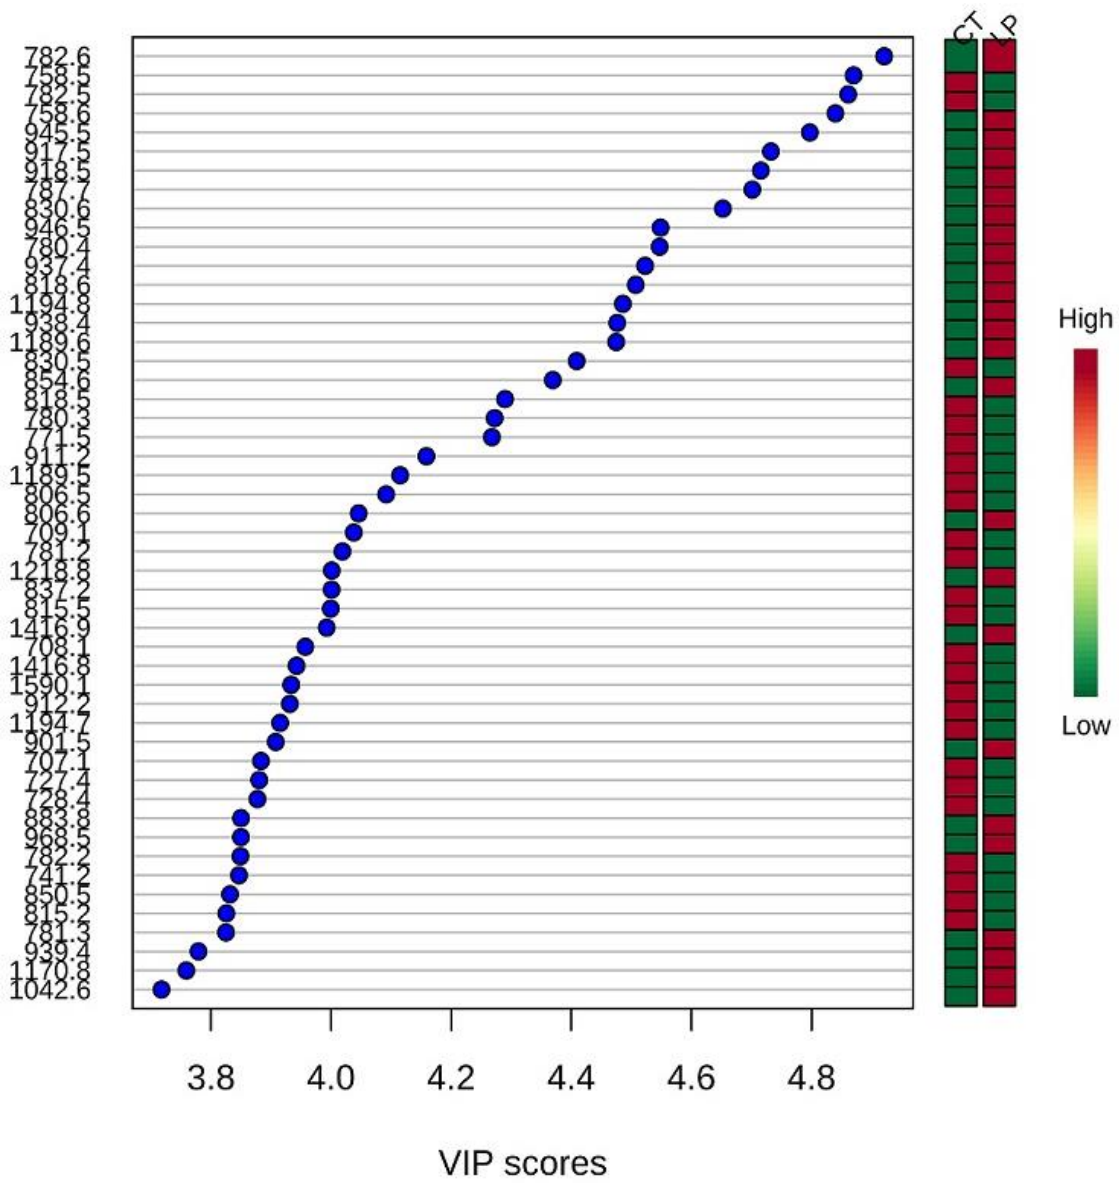

CT: Control group (C); LP: Pera Orange Group (PO)

Analysis of Variable Importance in Projection (VIP). Main masses of low molecular weight (100 to 700  $m/z$ ) responsible for discriminating between the MO group and the C group.

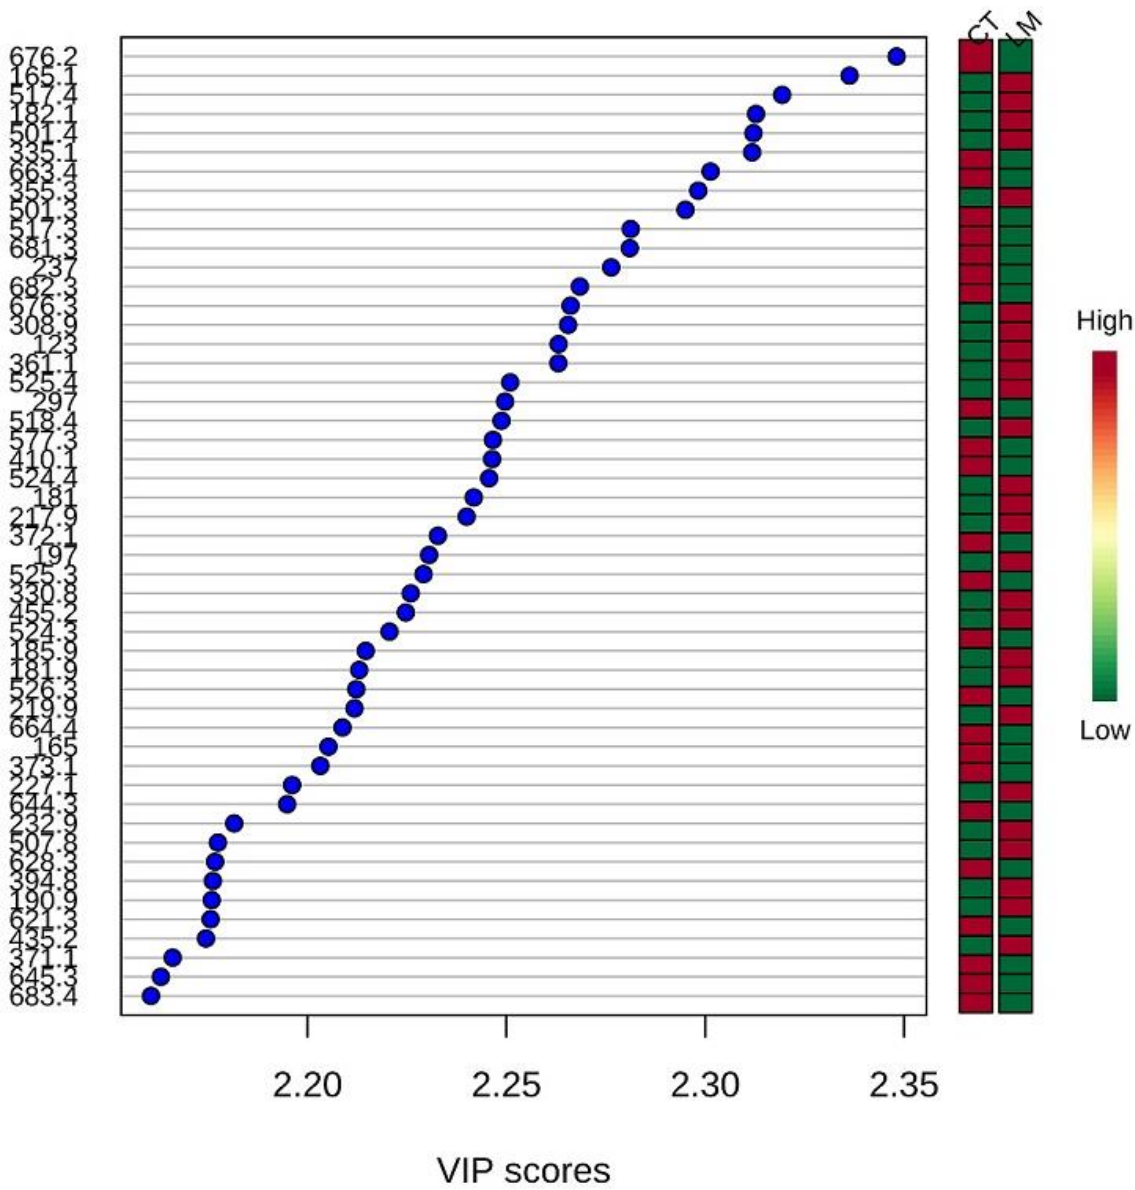

Analysis of Variable Importance in Projection (VIP). Main masses of low molecular weight (700 a 1700 *m/z*) responsible for discriminating between the MO group and the C group.

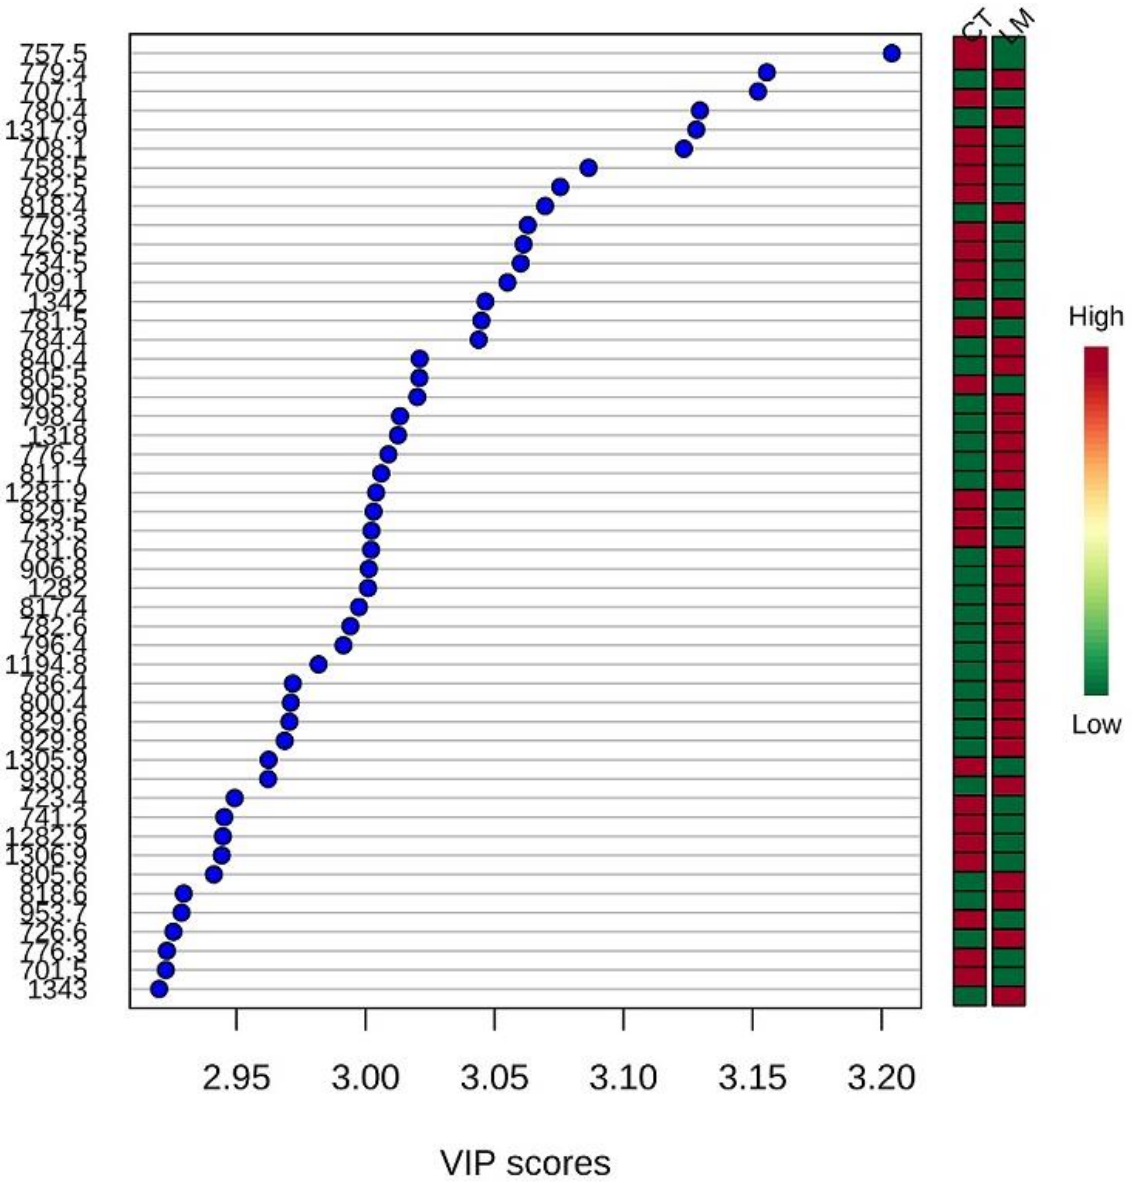

CT: Control group (C); LM: Moro Orange Group (MO)
